# Supplementary material
Source: PubMed Central journal article supplement (PMC5436143)
Supplement: NIHMS854384-supplement-Suppl_03.pdf [file NIHMS854384-supplement-Suppl_03.pdf]

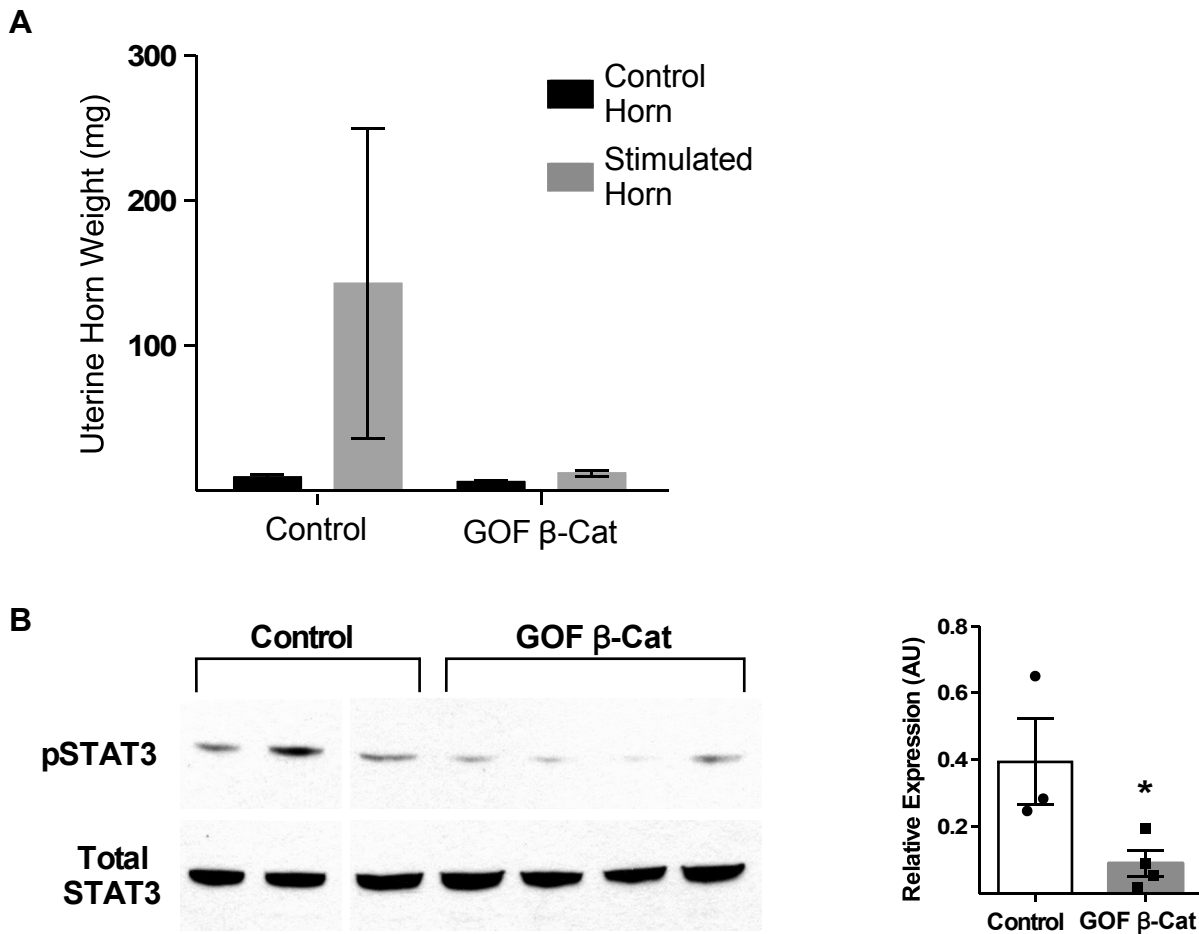

**Supplementary Figure 1. Treatment with exogenous hormones does not rescue the phenotype observed in GOF  $\beta$ -catenin mice. (A)** Control (n=2) and GOF  $\beta$ -catenin (n=3) mice were ovariectomized and treated with estrogen and progesterone as described in the materials and methods section. The left uterine horn was induced to decidualize by scratching the luminal epithelium. Five days later, uterine horns were collected and weighed. **(B)** Control (n=3) and GOF  $\beta$ -catenin (n=4) mice were treated with estrogen and progesterone in a manner consistent with early pregnancy. pSTAT3 protein levels were assessed by WB in control and GOF  $\beta$ -catenin uteri and normalized to total STAT3 protein (P=0.05). Columns represent mean and bars represent s.e.m.
